# Supplementary material for: Mechanistic insight into the Dehalococcoides-mediated reductive dechlorination of polychlorinated biphenyls
Source: Royal Society of Chemistry journal article supplement (doi:10.1039/d3cp01055d), 2023-01-01
Supplement: d3cp01055d1.pdf [file d3cp01055d1.pdf]

## Supplementary Information for

### Mechanistic insight into Dehalococcoides-mediated reductive dechlorination of polychlorinated biphenyls

Shangwei Zhang,<sup>\*ab</sup> Wei Ouyang,<sup>ab</sup> Xinghui Xia,<sup>b</sup> Wu Wen,<sup>\*c</sup> Lorenz Adrian,<sup>de</sup> and Gerrit Schüürmann<sup>fg</sup>

<sup>a</sup>Advanced Interdisciplinary Institute of Environment and Ecology, Beijing Normal University, Zhuhai, 519087, China

<sup>b</sup>State Key Laboratory of Water Environment Simulation, School of Environment, Beijing Normal University, Beijing, 100875 China

<sup>c</sup>Instrumentation and Service Centre for Science and Technology, Beijing Normal University, Zhuhai, 519087, China

<sup>d</sup>UFZ Department of Environmental Biotechnology, Helmholtz Centre for Environmental Research, Permoserstraße 15, 04318 Leipzig, Germany

<sup>e</sup>Chair of Geobiotechnology, Technische Universität Berlin, Ackerstraße 76, 13355 Berlin, Germany

<sup>f</sup>UFZ Department of Ecological Chemistry, Helmholtz Centre for Environmental Research, Permoserstraße 15, 04318 Leipzig, Germany

<sup>g</sup>Technical University Bergakademie Freiberg, Institute of Organic Chemistry, Leipziger Straße 29, 09596 Freiberg, Germany

\*Correspondence should be addressed to S. Z. (E-mail: [zhangshangwei@bnu.edu.cn](mailto:zhangshangwei@bnu.edu.cn), [shangwei.zhang@ufz.de](mailto:shangwei.zhang@ufz.de)) and W. W. ([wenwuliwen@bnu.edu.cn](mailto:wenwuliwen@bnu.edu.cn))

## Table of Contents

|                                                                                                                           |   |
|---------------------------------------------------------------------------------------------------------------------------|---|
| <b>Table S1</b> Key molecular orbitals of 2345-236-CB .....                                                               | 3 |
| <b>Table S2</b> The contributions of natural bond orbital to molecular orbital.....                                       | 4 |
| <b>Table S3</b> The oxidation states of cobalt and other elements for species along reaction coordinates.....             | 5 |
| <b>Fig. S1</b> Reductive dechlorination kinetics of PCB132and PCB174 with <i>Dehalococcoides mccartyi</i> strain CG1..... | 9 |

**Table S1** Key molecular orbitals (MO) of 2345-236-CB<sup>a</sup>

| orbital position | orbital shape                                                                       | orbital position | orbital shape                                                                        |
|------------------|-------------------------------------------------------------------------------------|------------------|--------------------------------------------------------------------------------------|
| LUMO+5           | 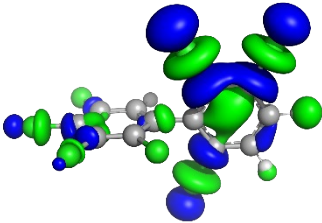   | LUMO+4           |    |
| LUMO+3           |    | LUMO+2           |    |
| LUMO+1           |  | LUMO             |  |
| HOMO             |  |                  |                                                                                      |

<sup>a</sup> Key molecular orbitals calculated at spin-unrestricted BP86/Def2TZVPP//BP86/Def2SVP covers two frontier MOs (HOMO and LUMO) and five energy-lowest unoccupied MOs (LUMO+1 ... LUMO+5). The structure of 2345-236-PCB is represented by balls and sticks. The blue and green isosurfaces of MOs are depicted at isovalues of 0.03 and -0.03, respectively.

**Table S2** The contributions of natural bond orbital (NBO) to molecular orbital (MO)<sup>a</sup>

| compound     | MO     | NBO contribution to MO   |                          |                  |
|--------------|--------|--------------------------|--------------------------|------------------|
|              |        | contribution coefficient | NBO                      | contribution (%) |
| cob(I)alamin | HOMO   | 0.961                    | [ 76]: LP ( 1)Co 1(lp)   | 92.4             |
| 234-236-PCB  | LUMO+4 | 0.466                    | [104]: BD*( 1) C 8-Cl 9* | 21.7             |
|              |        | 0.453                    | [102]: BD*( 1) C 6-Cl 7* | 20.5             |
|              |        | 0.409                    | [ 90]: BD*( 1)Cl 1- C 2* | 16.7             |
|              |        | -0.31                    | [118]: BD*( 1) C17-Cl18* | 9.61             |
|              |        | -0.246                   | [115]: BD*( 1) C15-Cl16* | 6.05             |
|              |        | -0.231                   | [108]: BD*( 1) C11-Cl12* | 5.34             |
| 2345-236-PCB | LUMO+4 | 0.489                    | [124]: BD*( 1) C16-Cl17* | 23.9             |
|              |        | 0.470                    | [121]: BD*( 1) C14-Cl15* | 22.1             |
|              |        | 0.390                    | [126]: BD*( 1) C18-Cl19* | 15.2             |
|              |        | 0.381                    | [119]: BD*( 1) C12-Cl13* | 14.5             |

<sup>a</sup> The molecular orbital decomposition to natural bond orbital were done by NBO 6.0 implanted in Gaussian Rev 09 D.01 at theoretical level of spin-unrestricted BP86/Def2TZVPP//BP86/Def2SVP.

**Table S3** The oxidation states of cobalt and other elements for species along reaction coordinates of configuration specific route, Cl<sub>3</sub>-234Ar-a<sub>2</sub> of 234-236-CB<sup>a</sup>

| atom number (atom) | RC | TS | IM | PC |
|--------------------|----|----|----|----|
| 1(Co)              | 1  | 3  | 3  | 2  |
| 2(N)               | -3 | -3 | -3 | -3 |
| 3(N)               | -3 | -3 | -3 | -3 |
| 4(N)               | -3 | -3 | -3 | -3 |
| 5(N)               | -3 | -3 | -3 | -3 |
| 6(C)               | 0  | 0  | 0  | 0  |
| 7(C)               | 0  | 0  | 0  | 0  |
| 8(C)               | 4  | 4  | 4  | 4  |
| 9(C)               | 4  | 4  | 4  | 4  |
| 10(C)              | 4  | 4  | 4  | 4  |
| 11(O)              | -2 | -2 | -2 | -2 |
| 12(C)              | 4  | 4  | 4  | 4  |
| 13(C)              | 4  | 4  | 4  | 4  |
| 14(C)              | 4  | 4  | 4  | 4  |
| 15(C)              | 4  | 4  | 4  | 4  |
| 16(C)              | 4  | 4  | 4  | 4  |
| 17(C)              | 4  | 4  | 4  | 4  |
| 18(C)              | 2  | 2  | 2  | 2  |
| 19(C)              | 4  | 4  | 4  | 4  |
| 20(C)              | 4  | 4  | 4  | 4  |
| 21(C)              | 4  | 4  | 4  | 4  |
| 22(C)              | 4  | 4  | 4  | 4  |
| 23(C)              | 4  | 4  | 4  | 4  |
| 24(C)              | 4  | 4  | 4  | 4  |
| 25(C)              | 4  | 4  | 4  | 4  |
| 26(C)              | 4  | 4  | 4  | 4  |
| 27(C)              | 4  | 4  | 4  | 4  |
| 28(C)              | -1 | -1 | 1  | 3  |
| 29(C)              | 1  | 0  | 0  | 1  |
| 30(C)              | 3  | 3  | 4  | 1  |
| 31(C)              | 4  | 4  | 4  | 4  |
| 32(O)              | -2 | -2 | -2 | -2 |
| 33(N)              | -3 | -3 | -3 | -3 |
| 34(C)              | 3  | 4  | 3  | 3  |
| 35(C)              | 4  | 4  | 3  | 3  |
| 36(C)              | 4  | 4  | 4  | 4  |
| 37(N)              | -3 | -3 | -3 | -3 |
| 38(O)              | -2 | -2 | -2 | -2 |
| 39(C)              | 1  | 2  | 0  | 1  |
| 40(C)              | 1  | 0  | 0  | 1  |
| 41(C)              | 4  | 4  | 2  | 3  |
| 42(C)              | 4  | 4  | 4  | 4  |
| 43(O)              | -2 | -2 | -2 | -2 |
| 44(N)              | -3 | -3 | -3 | -3 |
| 45(C)              | 4  | 4  | 4  | 3  |
| 46(C)              | 2  | 1  | 2  | 2  |
| 47(C)              | 4  | 4  | 4  | 4  |

|        |    |    |    |    |
|--------|----|----|----|----|
| 48(O)  | -2 | -2 | -2 | -2 |
| 49(N)  | -3 | -3 | -3 | -3 |
| 50(C)  | -2 | -2 | -2 | -2 |
| 51(C)  | 1  | 1  | 1  | 2  |
| 52(C)  | 4  | 2  | 3  | 3  |
| 53(C)  | 4  | 4  | 4  | 4  |
| 54(C)  | 4  | 4  | 4  | 4  |
| 55(O)  | -2 | -2 | -2 | -2 |
| 56(N)  | -3 | -3 | -3 | -3 |
| 57(C)  | 2  | 3  | 1  | 0  |
| 58(C)  | -1 | 0  | -1 | -2 |
| 59(C)  | 4  | 4  | 4  | 2  |
| 60(C)  | 4  | 4  | 3  | 4  |
| 61(C)  | 4  | 4  | 4  | 4  |
| 62(O)  | -2 | -2 | -2 | -2 |
| 63(N)  | -3 | -3 | -3 | -3 |
| 64(C)  | 4  | 3  | 4  | 3  |
| 65(C)  | 4  | 4  | 4  | 4  |
| 66(N)  | -3 | -3 | -3 | -3 |
| 67(O)  | -2 | -2 | -2 | -2 |
| 68(H)  | 1  | 1  | 1  | 1  |
| 69(H)  | 1  | 1  | 1  | 1  |
| 70(H)  | 1  | 1  | 1  | 1  |
| 71(H)  | 1  | 1  | 1  | 1  |
| 72(H)  | 1  | 1  | 1  | 1  |
| 73(H)  | 1  | 1  | 1  | 1  |
| 74(H)  | 1  | 1  | 1  | 1  |
| 75(H)  | 1  | 1  | 1  | 1  |
| 76(H)  | 1  | 1  | 1  | 1  |
| 77(H)  | 1  | 1  | 1  | 1  |
| 78(H)  | 1  | 1  | 1  | 1  |
| 79(H)  | 1  | 1  | 1  | 1  |
| 80(H)  | 1  | 1  | 1  | 1  |
| 81(H)  | 1  | 1  | 1  | 1  |
| 82(H)  | 1  | 1  | 1  | 1  |
| 83(H)  | 1  | 1  | 1  | 1  |
| 84(H)  | 1  | 1  | 1  | 1  |
| 85(H)  | 1  | 1  | 1  | 1  |
| 86(H)  | 1  | 1  | 1  | 1  |
| 87(H)  | 1  | 1  | 1  | 1  |
| 88(H)  | 1  | 1  | 1  | 1  |
| 89(H)  | 1  | 1  | 1  | 1  |
| 90(H)  | 1  | 1  | 1  | 1  |
| 91(H)  | 1  | 1  | 1  | 1  |
| 92(H)  | 1  | 1  | 1  | 1  |
| 93(H)  | 1  | 1  | 1  | 1  |
| 94(H)  | 1  | 1  | 1  | 1  |
| 95(H)  | 1  | 1  | 1  | 1  |
| 96(H)  | 1  | 1  | 1  | 1  |
| 97(H)  | 1  | 1  | 1  | 1  |
| 98(H)  | 1  | 1  | 1  | 1  |
| 99(H)  | 1  | 1  | 1  | 1  |
| 100(H) | 1  | 1  | 1  | 1  |

|         |    |    |    |    |
|---------|----|----|----|----|
| 101(H)  | 1  | 1  | 1  | 1  |
| 102(H)  | 1  | 1  | 1  | 1  |
| 103(H)  | 1  | 1  | 1  | 1  |
| 104(H)  | 1  | 1  | 1  | 1  |
| 105(H)  | 1  | 1  | 1  | 1  |
| 106(H)  | 1  | 1  | 1  | 1  |
| 107(H)  | 1  | 1  | 1  | 1  |
| 108(H)  | 1  | 1  | 1  | 1  |
| 109(H)  | 1  | 1  | 1  | 1  |
| 110(H)  | 1  | 1  | 1  | 1  |
| 111(H)  | 1  | 1  | 1  | 1  |
| 112(H)  | 1  | 1  | 1  | 1  |
| 113(H)  | 1  | 1  | 1  | 1  |
| 114(H)  | 1  | 1  | 1  | 1  |
| 115(H)  | 1  | 1  | 1  | 1  |
| 116(H)  | 1  | 1  | 1  | 1  |
| 117(H)  | 1  | 1  | 1  | 1  |
| 118(H)  | 1  | 1  | 1  | 1  |
| 119(H)  | 1  | 1  | 1  | 1  |
| 120(H)  | 1  | 1  | 1  | 1  |
| 121(H)  | 1  | 1  | 1  | 1  |
| 122(H)  | 1  | 1  | 1  | 1  |
| 123(H)  | 1  | 1  | 1  | 1  |
| 124(H)  | 1  | 1  | 1  | 1  |
| 125(H)  | 1  | 1  | 1  | 1  |
| 126(H)  | 1  | 1  | 1  | 1  |
| 127(H)  | 1  | 1  | 1  | 1  |
| 128(H)  | 1  | 1  | 1  | 1  |
| 129(H)  | 1  | 1  | 1  | 1  |
| 130(H)  | 1  | 1  | 1  | 1  |
| 131(H)  | 1  | 1  | 1  | 1  |
| 132(H)  | 1  | 1  | 1  | 1  |
| 133(H)  | 1  | 1  | 1  | 1  |
| 134(H)  | 1  | 1  | 1  | 1  |
| 135(H)  | 1  | 1  | 1  | 1  |
| 136(H)  | 1  | 1  | 1  | 1  |
| 137(H)  | 1  | 1  | 1  | 1  |
| 138(C)  | 2  | 2  | 2  | 2  |
| 139(C)  | 2  | 2  | 2  | 2  |
| 140(C)  | 2  | 2  | 2  | 2  |
| 141(C)  | 2  | 2  | 2  | 2  |
| 142(C)  | 2  | 2  | 2  | 2  |
| 143(C)  | 4  | 4  | 4  | 4  |
| 144(O)  | -2 | -2 | -2 | -2 |
| 145(H)  | 1  | 1  | 1  | 1  |
| 146(H)  | 1  | 1  | 1  | 1  |
| 147(H)  | 1  | 1  | 1  | 1  |
| 148(H)  | 1  | 1  | 1  | 1  |
| 149(H)  | 1  | 1  | 1  | 1  |
| 150(H)  | 1  | 1  | 1  | 1  |
| 151(Cl) | -1 | -1 | -1 | -1 |
| 152(C)  | 4  | 2  | 2  | 2  |
| 153(C)  | 4  | 4  | 4  | 4  |

|         |    |    |    |    |
|---------|----|----|----|----|
| 154(C ) | 4  | 4  | 4  | 4  |
| 155(C ) | 4  | 4  | 4  | 4  |
| 156(C ) | 2  | 2  | 2  | 2  |
| 157(C ) | 2  | 2  | 2  | 2  |
| 158(C ) | 4  | 4  | 4  | 4  |
| 159(H ) | 1  | 1  | 1  | 1  |
| 160(C ) | 4  | 4  | 4  | 4  |
| 161(C ) | 4  | 4  | 4  | 4  |
| 162(C ) | 4  | 4  | 4  | 4  |
| 163(C ) | 2  | 2  | 2  | 2  |
| 164(C ) | 2  | 2  | 2  | 2  |
| 165(Cl) | -1 | -1 | -1 | -1 |
| 166(Cl) | -1 | -1 | -1 | -1 |
| 167(Cl) | -1 | -1 | -1 | -1 |
| 168(Cl) | -1 | -1 | -1 | -1 |
| 169(H ) | 1  | 1  | 1  | 1  |
| 170(H ) | 1  | 1  | 1  | 1  |
| 171(H ) | 1  | 1  | 1  | 1  |
| 172(Cl) | -1 | -1 | -1 | -1 |

---

<sup>a</sup> The oxidation states of all species are calculated at spin-unrestricted BP86/Def2TZVPP//BP86/Def2SVP according to localized orbital bonding method.

The oxidation states of Co in RC, TS, IM, an PC at other configuration-specific reaction routes are the same as their counterparts here and thus are not given.



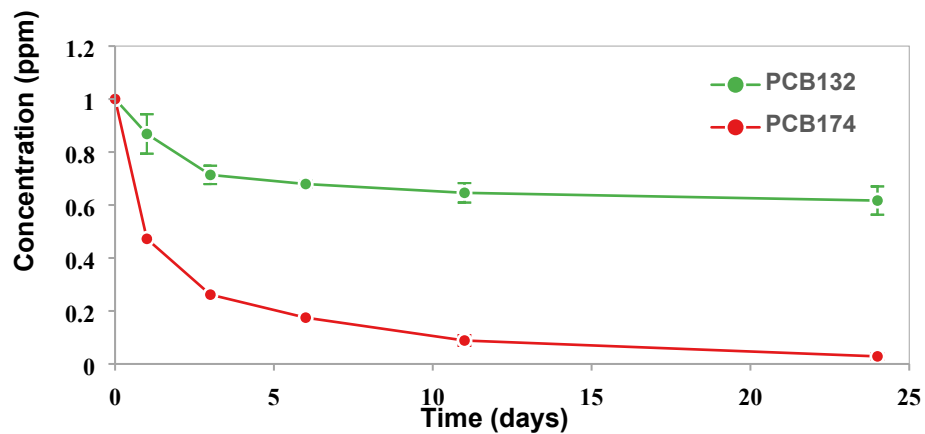

**Fig. S1** Reductive dechlorination kinetics of PCB132 (234-236-CB) and PCB174 (2345-236-CB) with *Dehalococcoides mccartyi* strain CG1. The data was obtained from reference [1].

## References

[1] L. Yu, Q. Lu, L. Qiu, G. Xu, Y. Zeng, X. Luo, S. Wang and B. Mai, Applied Environmental Microbiology, 2018, 84, e01300-01318.
